# Supplementary material for: MG53 Preserves Neuromuscular Junction Integrity and Alleviates ALS Disease Progression
Source: MDPI journal article supplement (doi:10.3390/antiox10101522), 2021-09-25
Supplement: s1 [file s1]

# MG53 preserves neuromuscular junction integrity and alleviates ALS disease progression

JianxunYi<sup>1,2</sup>, AngLi<sup>1,2</sup>, XuejunLi<sup>1,2</sup>, KiHoPark<sup>3</sup>, XinyuZhou<sup>3</sup>, FrankYi<sup>3</sup>, YajuanXiao<sup>2</sup>, DosukYoon<sup>2</sup>, TaoTan<sup>3</sup>, LyleW.Ostrow<sup>4</sup>,  
JianjieMa<sup>3</sup> and JingsongZhou<sup>1,2</sup>

<sup>1</sup>University of Texas at Arlington

<sup>2</sup>Kansas City University of Medicine and Biosciences

<sup>3</sup>The Ohio State University

<sup>4</sup>Johns Hopkins University School of Medicine

¶

Corresponding authors:

Jingsong Zhou

University of Texas at Arlington

Department of Kinesiology

Email: Jingsong.zhou@uta.edu

Jianjie Ma

The Ohio State University

Department of Surgery

Email: [Jianjie.ma@osumc.edu](mailto:Jianjie.ma@osumc.edu)

## Supplementary Figure S1

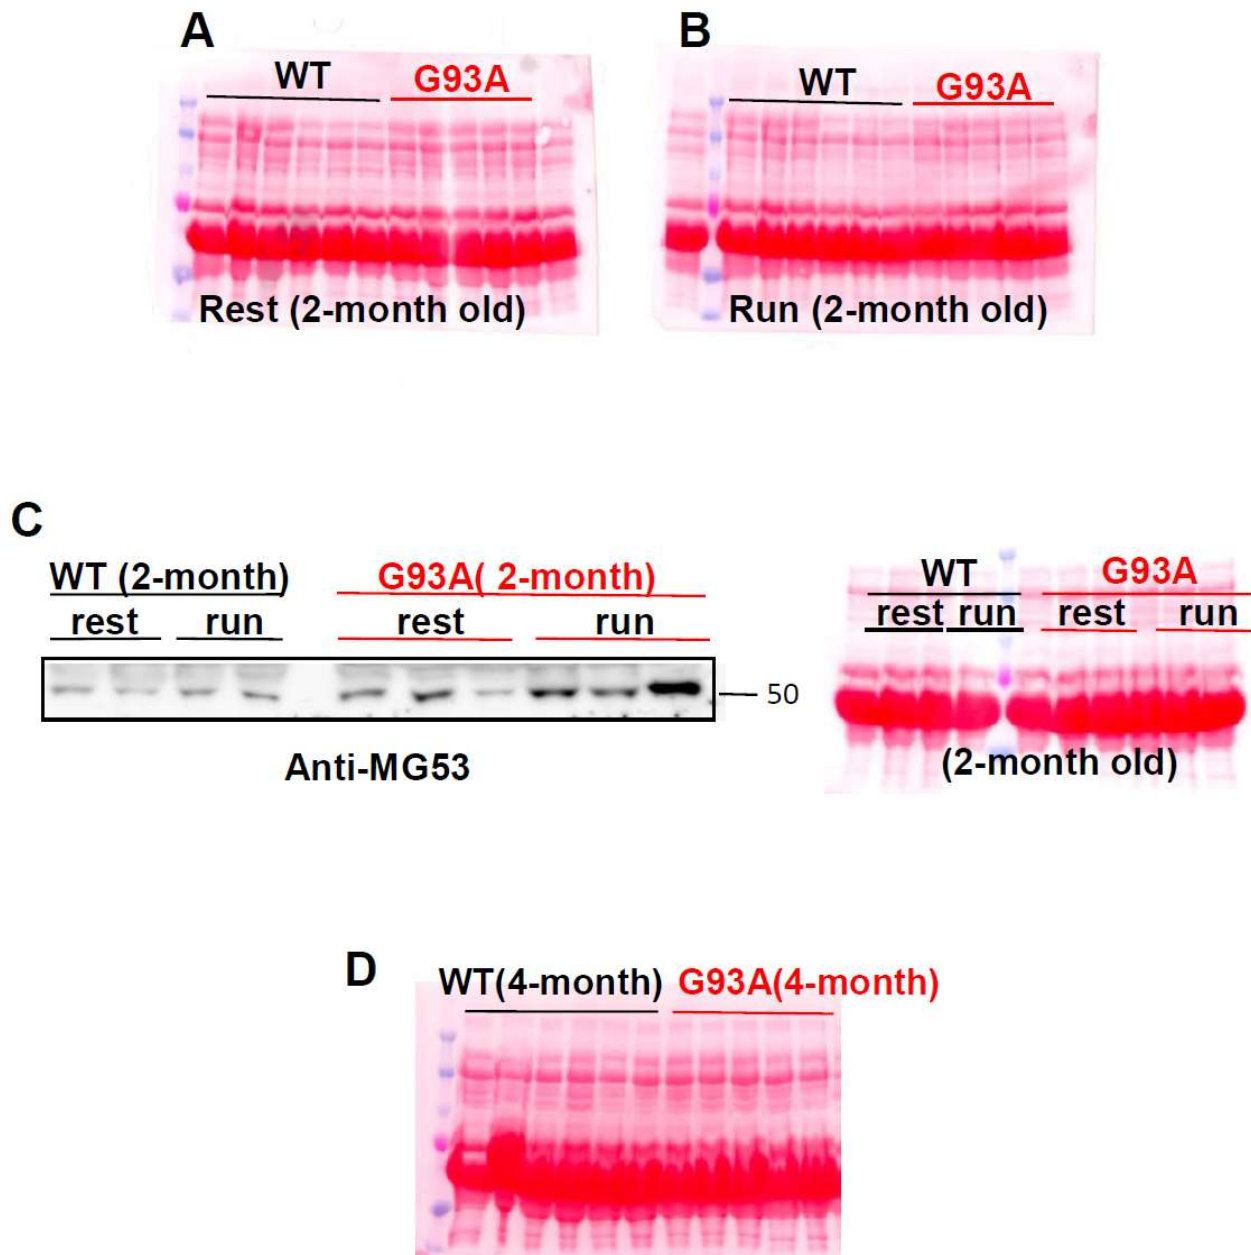

**Supplementary Figure S1 (A,B)** Ponceau S staining of the immunoblotting assay in **Figure 2D** verifies equal loading amount of the serum samples of 2-month old mice. **(C)** Due to limited numbers of lanes in the acrylamide gel, the additional blotting assay of 2 WT and 3 G93A serum samples before and after running were evaluated in a separate gel. Data from this blot were also included in **Figure 2D** quantification results. **(D)** Ponceau S staining of the immunoblotting assay in **Figure 2E** verifies equal loading amount of the serum samples of 4-month old mice.

## Supplementary Figure S2

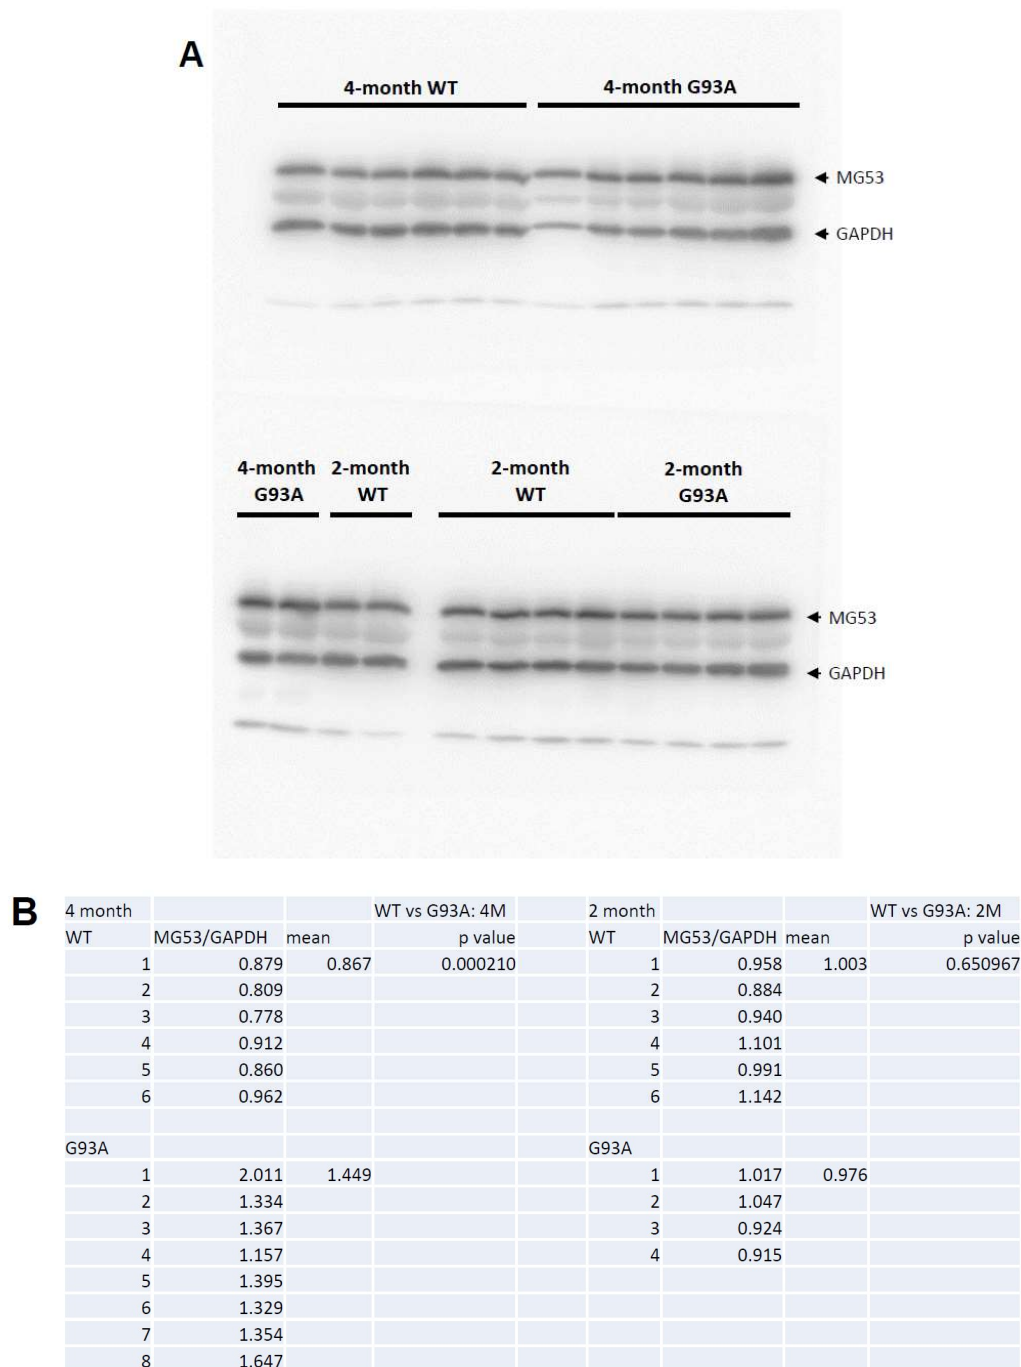

**Supplementary Figure S2.** (A) The original blots for MG53 protein level in TA muscles derived from G93A and WT mice at the age of 2-month and 4-month. Anti-MG53 and anti-GAPDH were applied together during blotting. (B) Quantification of the MG53 expression level normalized to the GAPDH expression. Note, there is no significant change in MG53 expression level at the age of 2 months,  $p > 0.5$ ,  $n = 4-6$  mice; while the MG53 expression level is significantly higher in G93A muscle at the age of 4 months,  $p = 0.0002$ ,  $n = 6-8$  mice.

**Supplementary Table S1: Demographics of humandecedents**

| ID  | Race/<br>Gender | Age at<br>onset | Age at<br>death | Site of onset             | Diagnosis  | C9ORF72<br>expansion | SOD1<br>mutation |
|-----|-----------------|-----------------|-----------------|---------------------------|------------|----------------------|------------------|
| 38  | WF              | 33              | 34              | Upper + lower extremities | fALS       | Yes                  | No               |
| 88  | WM              | 57              | 59              | Bulbar                    | fALS + FTD | Yes                  | No               |
| 90  | WF              | 57              | 59              | Bulbar + Respiratory      | sALS       | No                   | No               |
| 93  | WM              | 65              | 68              | left hand                 | sALS       | No                   | No               |
| 102 | BF              | 70              | 72              | Bulbar                    | sALS       | No                   | No               |
| 104 | WF              | 69              | 71              | Bulbar                    | sALS       | No                   | No               |
| 105 | WM              | 61              | 69              | left leg                  | sALS       | No                   | No               |
| 107 | WM              | 67              | 69              | left hand                 | sALS       | No                   | No               |
| 112 | WM              | 67              | 69              | right hand                | sALS       | No                   | No               |
| 116 | WF              | 64              | 67              | Left foot                 | sALS       | No                   | No               |

| ID  | Race/<br>Gender | Age at<br>death | Diagnosis                | Cause of Death                                          |
|-----|-----------------|-----------------|--------------------------|---------------------------------------------------------|
| 103 | WM              | 22              | Non-Neurological Control | Metastatic synovial sarcoma (no CNS mets)               |
| 123 | BM              | 52              | Non-Neurological Control | Pancreatic Cancer (no CNS mets)                         |
| 129 | WF              | 63              | Non-Neurological Control | Colon cancer with liver & lymph node mets (no CNS mets) |

**Supplementary Table S2: Biospecimen information for humansamples**

| ID  | Biospecimen<br>type | Anatomic<br>site    | Vital state<br>of patient | Collection | Type of<br>stabilization | Type of long<br>term<br>preservation | Constitution<br>of<br>preservative   | Storage<br>duration | Shipping<br>temperature | Composition<br>Assessment<br>& selection |
|-----|---------------------|---------------------|---------------------------|------------|--------------------------|--------------------------------------|--------------------------------------|---------------------|-------------------------|------------------------------------------|
| 38  | Skeletal muscle     | Diaphragm           | Postmortem                | Autopsy    | Formalin fixed           | Paraffin<br>embedded                 | 10% neutral-<br>buffered<br>formalin | 21 years            | 25°C                    | Clinical, genetic &<br>neuropathological |
| 88  | Skeletal muscle     | Diaphragm           | Postmortem                | Autopsy    | Formalin fixed           | Paraffin<br>embedded                 | 10% neutral-<br>buffered<br>formalin | 1-7 years           | 25°C                    | Clinical, genetic &<br>neuropathological |
| 90  | Skeletal muscle     | Psoas               | Postmortem                | Autopsy    | Formalin fixed           | Paraffin<br>embedded                 | 10% neutral-<br>buffered<br>formalin | 1-7 years           | 25°C                    | Clinical, genetic &<br>neuropathological |
| 93  | Skeletal muscle     | Psoas               | Postmortem                | Autopsy    | Formalin fixed           | Paraffin<br>embedded                 | 10% neutral-<br>buffered<br>formalin | 1-7 years           | 25°C                    | Clinical, genetic &<br>neuropathological |
| 102 | Skeletal muscle     | Diaphragm           | Postmortem                | Autopsy    | Formalin fixed           | Paraffin<br>embedded                 | 10% neutral-<br>buffered<br>formalin | 1-7 years           | 25°C                    | Clinical, genetic &<br>neuropathological |
| 104 | Skeletal muscle     | Diaphragm           | Postmortem                | Autopsy    | Formalin fixed           | Paraffin<br>embedded                 | 10% neutral-<br>buffered<br>formalin | 1-7 years           | 25°C                    | Clinical, genetic &<br>neuropathological |
| 105 | Skeletal muscle     | Psoas               | Postmortem                | Autopsy    | Formalin fixed           | Paraffin<br>embedded                 | 10% neutral-<br>buffered<br>formalin | 1-7 years           | 25°C                    | Clinical, genetic &<br>neuropathological |
| 107 | Skeletal muscle     | Psoas               | Postmortem                | Autopsy    | Formalin fixed           | Paraffin<br>embedded                 | 10% neutral-<br>buffered<br>formalin | 1-7 years           | 25°C                    | Clinical, genetic &<br>neuropathological |
| 112 | Skeletal muscle     | Psoas               | Postmortem                | Autopsy    | Formalin fixed           | Paraffin<br>embedded                 | 10% neutral-<br>buffered<br>formalin | 1-7 years           | 25°C                    | Clinical, genetic &<br>neuropathological |
| 116 | Skeletal muscle     | Diaphragm/<br>psoas | Postmortem                | Autopsy    | Formalin fixed           | Paraffin<br>embedded                 | 10% neutral-<br>buffered<br>formalin | 1-7 years           | 25°C                    | Clinical, genetic &<br>neuropathological |
| 103 | Skeletal muscle     | Diaphragm/<br>psoas | Postmortem                | Autopsy    | Formalin fixed           | Paraffin<br>embedded                 | 10% neutral-<br>buffered<br>formalin | 1-7 years           | 25°C                    | Clinical, genetic &<br>neuropathological |
| 123 | Skeletal muscle     | Psoas               | Postmortem                | Autopsy    | Formalin fixed           | Paraffin<br>embedded                 | 10% neutral-<br>buffered<br>formalin | 1-7 years           | 25°C                    | Clinical, genetic &<br>neuropathological |
| 129 | Skeletal muscle     | Psoas               | Postmortem                | Autopsy    | Formalin fixed           | Paraffin<br>embedded                 | 10% neutral-<br>buffered<br>formalin | 1-7 years           | 25°C                    | Clinical, genetic &<br>neuropathological |
